# Supplementary material
Source: PubMed Central journal article supplement (PMC4174945)
Supplement: 26f5fdbee3909c3ed203c9f905ecf831_genetics.114.167486-6.pdf [file 26f5fdbee3909c3ed203c9f905ecf831_genetics.114.167486-6.pdf]

## Pedigree

TBBC3-38

Population of BC<sub>3</sub>  
Introgression Lines (TBBC3)

Refer to Chung et al. 2010

TBBC3-38\_19E

BC<sub>4</sub>F<sub>3</sub>

Backcrossed to B73 and selfed

(BC<sub>4</sub>F<sub>3</sub>)BC<sub>1</sub>F<sub>2</sub>

Selected 15 heterozygous individuals  
Identified 113 recombinant individuals

(BC<sub>4</sub>F<sub>3</sub>)BC<sub>1</sub>F<sub>3</sub>

4,475 plants screened for recombinants

(BC<sub>4</sub>F<sub>3</sub>)BC<sub>1</sub>F<sub>4</sub>

Screened for fixed recombinants

(BC<sub>4</sub>F<sub>3</sub>)BC<sub>1</sub>F<sub>5</sub>

Evaluated for disease resistance  
(NLB & Stewart's wilt)

(BC<sub>4</sub>F<sub>3</sub>)BC<sub>1</sub>F<sub>6</sub>

Evaluated for disease resistance  
(NLB & Stewart's wilt)

**Figure S1 Near-isogenic line development.** Near-isogenic line development is shown beginning with population development by Szalma et al. (2007) and Chung et al. (2010), through homozygous recombinant screening.
