# Supplementary material
Source: PubMed Central journal article supplement (PMC4174945)
Supplement: 70fd37a054352f271bee7c9888863123_genetics.114.167486-3.pdf [file 70fd37a054352f271bee7c9888863123_genetics.114.167486-3.pdf]

**Table S1 Markers**

| Marker ID   | Locus name         | Physical position* | Forward primer 1                                            | Forward primer 2                                       | Common reverse primer            |
|-------------|--------------------|--------------------|-------------------------------------------------------------|--------------------------------------------------------|----------------------------------|
| snp_01_0042 | ch1_AC202158_78820 | 180,394,890        | GAAGGTGACCAAGTTCATGC<br>TGCCGATACCAATCACTGACA               | GAAGGTCGGAGTCAACGGATTCTGC<br>CGATACCAATCACTGACG        | GCCCCGGTCGGTACACAGTTA            |
| snp_01_0057 | chr1 183107525 C/T | 184,016,638        | GAAGGTGACCAAGTTCATGC<br>TCCCTCACCAGCGACCACC                 | GAAGGTCGGAGTCAACGGATTCTTC<br>CCTCACCAGCGACCACT         | GGCAGGCAAGGTCACAGAGGAA           |
| snp_01_0015 | PZA00068.1         | 183,986,082        | GAAGGTGACCAAGTTCATGC<br>TGACAGGGAACCGGATTCTA<br>TAG         | GAAGGTCGGAGTCAACGGATTGTG<br>ACAGGGAACCGGATTCTATAA      | GTTAATCTTCACCTGGTGCATCGTG<br>TA  |
| snp_01_0059 | chr1 184516928 G/A | 184,633,349        | TCCAGGGCCTGCTAACGCTGT<br>T                                  | GAAGGTCGGAGTCAACGGATTCTCAG<br>GGCCTGCTAACGCTGTC        | CGTACATGTGCCGCGCTTTATATA         |
| snp_01_0047 | chr1 185582569 A/C | 185,737,089        | GAAGGTGACCAAGTTCATGC<br>TGAATTGCTATTATTATATAA<br>CTCAACCCGT | GAAGGTCGGAGTCAACGGATTAATT<br>GCTATTATTATATAACTCAACCCGG | TCGGCCATCTCGGCAACCTCAA           |
| snp_01_0136 | ss229502009        | 187,090,230        | GAAGGTGACCAAGTTCATGC<br>TGCAATAACCATTGAACCAAC<br>GAC        | GAAGGTCGGAGTCAACGGATTCTGC<br>AATAACCATTGAACCAACGAG     | GTCCAGCTATAGGATAGGAAGAGC<br>AT   |
| snp_01_0137 | ss229502244        | 187,245,104        | GAAGGTGACCAAGTTCATGC<br>TGCGTCATTTTCTCGTCAGGG<br>C          | GAAGGTCGGAGTCAACGGATTCTGC<br>GTCATTTTCTCGTCAGGGA       | ACTCCATTATTCATGCTTGATGGAC<br>CTA |
| snp_01_0138 | ss229502327        | 187,272,680        | GAAGGTGACCAAGTTCATGC<br>TACTGCTAGCAGCTACTGCAG<br>G          | GAAGGTCGGAGTCAACGGATTCTAC<br>TGCTAGCAGCTACTGCAGA       | CCAACCTTTACCTAACATGTTTGC<br>TGTT |
| snp_01_0139 | ss229502401        | 187,341,010        | GAAGGTGACCAAGTTCATGC<br>TGCGCCTCTCCTCCACGGC                 | GAAGGTCGGAGTCAACGGATTGCG<br>CCTCTCCTCCACGGT            | ACGGTGCCCGGCGCGTGAA              |
| snp_01_0115 | ss229502466        | 187,399,046        | GAAGGTGACCAAGTTCATGC<br>TCGTAACGGCAAGCTTCTCTG<br>TGT        | GAAGGTCGGAGTCAACGGATTGTA<br>ACGGCAAGCTTCTCTGTGC        | TCTCTGGCGTAGGGTCTCTCT            |

|             |                    |             |                                               |                                                        |                                    |
|-------------|--------------------|-------------|-----------------------------------------------|--------------------------------------------------------|------------------------------------|
| snp_01_0116 | ss229502486        | 187,400,044 | GAAGGTGACCAAGTTCATGC<br>TTCCGCTGCCGCTGCGGA    | GAAGGTCGGAGTCAACGGATTCCGC<br>TGCCGCTGCGGG              | GCAGTCGTGGCGGTCCGAGTA              |
| snp_01_0117 | ss229502506        | 187,401,161 | GAAGGTGACCAAGTTCATGC<br>TGGACAGCGAACCCGGGGA   | GAAGGTCGGAGTCAACGGATTGGA<br>CAGCGAACCCGGGGG            | CCTTGGTCGCGTCTGGCTGCT              |
| snp_01_0118 | ss229502527        | 187,436,581 | TTTGTTAAGCAAGCACACAGA<br>AGCG                 | GAAGGTCGGAGTCAACGGATTTGTT<br>AAGCAAGCACACAGAAGCA       | CAGCTGCTCGTCTGTTGTTAAT             |
| snp_01_0079 | ss196501884        | 187,588,467 | GAAGGTGACCAAGTTCATGC<br>TACCGGAACATCGTCAAGAT  | GAAGGTCGGAGTCAACGGATTCCG<br>GAACATCGTCAAGATGGAG        | CGGAGAGGATCACGCCGAAGTT             |
| snp_01_0082 | ss229504554        | 189,336,643 | GAAGGTGACCAAGTTCATGC<br>TCCTTGCGCTCTCAGGTTTT  | GAAGGTCGGAGTCAACGGATTCTTG<br>GCA                       | TCATTAGGTGGGCCAGGCT                |
| snp_01_0083 | ss196429231        | 189,352,206 | GAAGGTGACCAAGTTCATGC<br>TCAGCCCCCTGTGCCGTT    | GAAGGTCGGAGTCAACGGATTCTTG<br>CCCCCTGTGCCGTC            | CCTCAAGCTCGAGCTGGGACT              |
| snp_01_0085 | ss196516288        | 190,594,339 | GAAGGTGACCAAGTTCATGC<br>TGTTTAAGAATTGGATATCAT | GAAGGTCGGAGTCAACGGATTCTTG<br>TTAAGAATTGGATATCATTGATCGA | GGCGTTGCTGATATCGCGTTCAATT          |
| snp_01_0061 | chr1 193313487 C/T | 193,478,836 | GAAGGTGACCAAGTTCATGC<br>TGGTTCGTCCATTGCCGGAAT | GAAGGTCGGAGTCAACGGATTCTTG<br>TTCGTCCATTGCCGGAATT       | CGAACTCAACAGAGGAATTCTTAC<br>CTT    |
| snp_01_0005 | PZA00619.3         | 195,557,990 | GAAGGTGACCAAGTTCATGC<br>TGAAGCACTCAACGCCGCCA  | GAAGGTCGGAGTCAACGGATTAGC<br>ACTCAACGCCGCCAGG           | GMCATGCATATATATATGGCTGCC<br>TCAT   |
| snp_01_0088 | ss229511302        | 196,306,976 | GAAGGTGACCAAGTTCATGC<br>TGATGTCCATGAATTTCCAG  | GAAGGTCGGAGTCAACGGATTGAT<br>GTCCATGAATTTCCAGTCCAT      | AGCTCAGTACACTAGTAAAAATTA<br>GGGTAA |

\*Physical positions are AGP\_V2.
