# Supplementary material
Source: PubMed Central journal article supplement (PMC4174945)
Supplement: b518e22be586c4ec85815c3ef0649438_genetics.114.167486-1.pdf [file b518e22be586c4ec85815c3ef0649438_genetics.114.167486-1.pdf]

**Pedigree**

TBBC3-38

Population of BC<sub>3</sub>  
Introgression Lines (TBBC3)

← Refer to Chung et al. 2010

TBBC3-38\_19E

BC<sub>4</sub>F<sub>3</sub>

← Backcrossed to B73 and selfed

(BC<sub>4</sub>F<sub>3</sub>)BC<sub>1</sub>F<sub>2</sub>

Selected 15 heterozygous individuals  
Identified 113 recombinant individuals

⊗ ↓  
(BC<sub>4</sub>F<sub>3</sub>)BC<sub>1</sub>F<sub>3</sub>

4,475 plants screened for recombinants

⊗ ↓  
(BC<sub>4</sub>F<sub>3</sub>)BC<sub>1</sub>F<sub>4</sub>

Screened for fixed recombinants

⊗ ↓  
(BC<sub>4</sub>F<sub>3</sub>)BC<sub>1</sub>F<sub>5</sub>

Evaluated for disease resistance  
(NLB & Stewart's wilt)

⊗ ↓  
(BC<sub>4</sub>F<sub>3</sub>)BC<sub>1</sub>F<sub>6</sub>

Evaluated for disease resistance  
(NLB & Stewart's wilt)

**Figure S1 Near-isogenic line development.** Near-isogenic line development is shown beginning with population development by Szalma et al. (2007) and Chung et al. (2010), through homozygous recombinant screening.

**File S1**

**Genotypic and phenotypic data for fine-mapping study**

Available for download as an Excel file at <http://www.genetics.org/lookup/suppl/doi:10.1534/genetics.114.167486/-/DC1>

**Table S1 Markers**

| Marker ID   | Locus name         | Physical position* | Forward primer 1                                                    | Forward primer 2                                       | Common reverse primer            |
|-------------|--------------------|--------------------|---------------------------------------------------------------------|--------------------------------------------------------|----------------------------------|
| snp_01_0042 | ch1_AC202158_78820 | 180,394,890        | GAAGGTGACCAAGTTCATGC<br>TGCCGATACCAATCACTGACA                       | GAAGGTCGGAGTCAACGGATTCTGC<br>CGATACCAATCACTGACG        | GCCCCGGTCGGTACACAGTTA            |
| snp_01_0057 | chr1 183107525 C/T | 184,016,638        | GAAGGTGACCAAGTTCATGC<br>TCCCTCACCAGCGACCACC                         | GAAGGTCGGAGTCAACGGATTCTTC<br>CCTCACCAGCGACCACT         | GGCAGGCAAGGTCACAGAGGAA           |
| snp_01_0015 | PZA00068.1         | 183,986,082        | GAAGGTGACCAAGTTCATGC<br>TGACAGGGAACCGGATTCTA<br>TAG                 | GAAGGTCGGAGTCAACGGATTGTG<br>ACAGGGAACCGGATTCTATAA      | GTTAATCTTCACCTGGTGCATCGTG<br>TA  |
| snp_01_0059 | chr1 184516928 G/A | 184,633,349        | GAAGGTGACCAAGTTCATGC<br>TCCAGGGCCTGCTAACGCTGT<br>T                  | GAAGGTCGGAGTCAACGGATTCTCAG<br>GGCCTGCTAACGCTGTC        | CGTACATGTGCCGCGCTTTATATA         |
| snp_01_0047 | chr1 185582569 A/C | 185,737,089        | GAAGGTGACCAAGTTCATGC<br>TGAATTGCTATTATTATATAA<br>CTCAACCCGT         | GAAGGTCGGAGTCAACGGATTAATT<br>GCTATTATTATATAACTCAACCCGG | TCGGCCATCTCGGCAACCTCAA           |
| snp_01_0136 | ss229502009        | 187,090,230        | GAAGGTGACCAAGTTCATGC<br>TGCAATAACCATTGAACCAAC<br>GAC                | GAAGGTCGGAGTCAACGGATTCTGC<br>AATAACCATTGAACCAACGAG     | GTCCAGCTATAGGATAGGAAGAGC<br>AT   |
| snp_01_0137 | ss229502244        | 187,245,104        | GAAGGTGACCAAGTTCATGC<br>TGCGTCATTTTCTCGTCAGGG<br>C                  | GAAGGTCGGAGTCAACGGATTCTGC<br>GTCATTTTCTCGTCAGGGA       | ACTCCATTATTCATGCTTGATGGAC<br>CTA |
| snp_01_0138 | ss229502327        | 187,272,680        | GAAGGTGACCAAGTTCATGC<br>TACTGCTAGCAGCTACTGCAG<br>G                  | GAAGGTCGGAGTCAACGGATTCTAC<br>TGCTAGCAGCTACTGCAGA       | CCAACCTTTACCTAACATGTTTGC<br>TGTT |
| snp_01_0139 | ss229502401        | 187,341,010        | GAAGGTGACCAAGTTCATGC<br>TGCGCCTCTCCTCCACGGC<br>GAAGGTGACCAAGTTCATGC | GAAGGTCGGAGTCAACGGATTGCG<br>CCTCTCCTCCACGGT            | ACGGTGCCCGGCGCGTGAA              |
| snp_01_0115 | ss229502466        | 187,399,046        | TCGTAACGGCAAGCTTCTCTG<br>TGT                                        | GAAGGTCGGAGTCAACGGATTGTA<br>ACGGCAAGCTTCTCTGTGC        | TCTCTGGCGTAGGGTCTCTCT            |

|             |                    |             |                                               |                                                        |                                    |
|-------------|--------------------|-------------|-----------------------------------------------|--------------------------------------------------------|------------------------------------|
| snp_01_0116 | ss229502486        | 187,400,044 | GAAGGTGACCAAGTTCATGC<br>TTCCGCTGCCGCTGCGGA    | GAAGGTCGGAGTCAACGGATTCCGC<br>TGCCGCTGCGGG              | GCAGTCGTGGCGGTCCGAGTA              |
| snp_01_0117 | ss229502506        | 187,401,161 | GAAGGTGACCAAGTTCATGC<br>TGGACAGCGAACCCGGGGA   | GAAGGTCGGAGTCAACGGATTGGA<br>CAGCGAACCCGGGGG            | CCTTGGTCGCGTCTGGCTGCT              |
| snp_01_0118 | ss229502527        | 187,436,581 | TTTGTTAAGCAAGCACACAGA<br>AGCG                 | GAAGGTCGGAGTCAACGGATTTGTT<br>AAGCAAGCACACAGAAGCA       | CAGCTGCTCGTCTGTTGTTAAT             |
| snp_01_0079 | ss196501884        | 187,588,467 | GAAGGTGACCAAGTTCATGC<br>TACCGGAACATCGTCAAGAT  | GAAGGTCGGAGTCAACGGATTCCG<br>GAACATCGTCAAGATGGAG        | CGGAGAGGATCACGCCGAAGTT             |
| snp_01_0082 | ss229504554        | 189,336,643 | GAAGGTGACCAAGTTCATGC<br>TCCTTGCGCTCTCAGGTTTT  | GAAGGTCGGAGTCAACGGATTCTTG<br>GCA                       | TCATTAGGTGGGCCAGGCT                |
| snp_01_0083 | ss196429231        | 189,352,206 | GAAGGTGACCAAGTTCATGC<br>TCAGCCCCCTGTCCGTT     | GAAGGTCGGAGTCAACGGATTCTTG<br>CCCCCTGTCCGTC             | CCTCAAGCTCGAGCTGGGACT              |
| snp_01_0085 | ss196516288        | 190,594,339 | GAAGGTGACCAAGTTCATGC<br>TGTTTAAGAATTGGATATCAT | GAAGGTCGGAGTCAACGGATTCTTG<br>TTAAGAATTGGATATCATTGATCGA | GGCGTTGCTGATATCGCGTTCAATT          |
| snp_01_0061 | chr1 193313487 C/T | 193,478,836 | GAAGGTGACCAAGTTCATGC<br>TGGTTCGTCCATTGCCGGAAT | GAAGGTCGGAGTCAACGGATTCTTG<br>TTCGTCCATTGCCGGAATT       | CGAACTCAACAGAGGAATTCTTAC<br>CTT    |
| snp_01_0005 | PZA00619.3         | 195,557,990 | GAAGGTGACCAAGTTCATGC<br>TGAAGCACTCAACGCCGCCA  | GAAGGTCGGAGTCAACGGATTAGC<br>ACTCAACGCCGCCAGG           | GMCATGCATATATATATGGCTGCC<br>TCAT   |
| snp_01_0088 | ss229511302        | 196,306,976 | GAAGGTGACCAAGTTCATGC<br>TGATGTCCATGAATTTCCAG  | GAAGGTCGGAGTCAACGGATTGAT<br>GTCCATGAATTTCCAGTCCAT      | AGCTCAGTACACTAGTAAAAATTA<br>GGGTAA |

\*Physical positions are AGP\_V2.

**Table S2 NLB QTL mapping studies.**

| Reference                       | Parents     | Resistance source                  | Population          | QTL mapping                | Trait                                                                     | Flanking markers             | Lower CI* | Upper CI* |
|---------------------------------|-------------|------------------------------------|---------------------|----------------------------|---------------------------------------------------------------------------|------------------------------|-----------|-----------|
|                                 |             |                                    |                     | Composite interval mapping |                                                                           |                              |           |           |
| Balint-Kurti <i>et al.</i> 2010 | B73 x Mo17  | B73                                | RIL                 | mapping                    | AUDPC (AU06WMD)                                                           | bnlg1598 umc1396             | 187.8     | 191.1     |
| Freymark <i>et al.</i> 1993     | B52 x Mo17  | B52                                | F <sub>2:3</sub>    | Interval mapping           | Average Number of lesions/leaf<br>Average percentage leaf tissue diseased | umc157 umc67<br>umc157 umc67 | 12.2      | 175.6     |
| Welz <i>et al.</i> 1999         | D32 x D145  | D32                                | F <sub>3</sub>      | Composite interval mapping | % diseased leaf area                                                      | csu61b dup12 (dupssr12)      | 181.0     | 239.6     |
| Wisser <i>et al.</i> 2008       | -           | -                                  | Recurrent selection | Selection mapping          | -                                                                         | bnlg615                      | 201.0     |           |
| Chung <i>et al.</i> 2010        | B73 x Tx303 | Tx303                              | NILs                | -                          | IP, AUDPC                                                                 | umc1754 umc2234              | 180.0     | 187.4     |
| Chung <i>et al.</i> 2011        | B73 x CML52 | CML52                              | HIFs                | -                          | IP, lesion number, diseased leaf area, AUDPC                              |                              | 182.6     | 189.8     |
|                                 | B73 x CML52 | CML52                              | RIL                 | ICIM                       | 3 diseased leaf area ratings                                              |                              | 200.4     | 205.8     |
| Zwonitzer <i>et al.</i> 2010    |             |                                    |                     | Multiple interval mapping  |                                                                           |                              |           |           |
|                                 | Ki14 x B73  | Ki14 B97                           | RIL                 | mapping                    | sAUDPC                                                                    | PZA01041.2 bnlg1057          | 157.1     | 190.0     |
| Poland <i>et al.</i> 2011       | NAM         | CML103<br>CML247<br>CML52<br>CML69 | NAM                 | Joint linkage mapping      | AUDPC                                                                     | PZA02191.1 PZA00619.3        | 182.5     | 195.6     |

Ki11  
Ki3  
M37W  
Mo17  
Mo18W  
NC358  
Tzi8

---

Previous QTL studies that identified QTL for NLB resistance at maize bin 1.06 are listed. Confidence interval (CI) locations are based on AGP\_V2.

**Table S3 Candidate genes**

| Gene ID          | Start (AGP_V2) | Stop (AGP_V2) | Interpro Description                                        |
|------------------|----------------|---------------|-------------------------------------------------------------|
| GRMZM2G119511    | 185735951      | 185738575     | Pyridoxal phosphate-dependent transferase                   |
| GRMZM2G419430    | 185737836      | 185738414     | Calcium-binding EF-hand                                     |
| GRMZM2G419431    | 185739064      | 185740761     |                                                             |
| GRMZM2G419436    | 185739619      | 185740699     | Serine/threonine-protein kinase, active site                |
| GRMZM2G119547    | 185741603      | 185742128     | Actin cross-linking                                         |
| GRMZM2G124428    | 185777384      | 185779013     | Wall-associated receptor kinase galacturonan-binding domain |
| AC190935.2_FG001 | 186007538      | 186008047     |                                                             |
| GRMZM2G116254    | 186214773      | 186215342     | Calcium-binding EF-hand                                     |
| GRMZM2G552586    | 186230672      | 186232165     | Aldehyde/histidinol dehydrogenase                           |
| GRMZM2G116236    | 186236715      | 186237201     |                                                             |
| GRMZM2G417360    | 186237596      | 186238072     | HAT dimerisation                                            |
| AC186416.3_FG001 | 186340690      | 186342603     |                                                             |
| GRMZM2G037493    | 186468876      | 186472999     | SANT/Myb domain                                             |
| GRMZM2G037581    | 186533673      | 186537407     | WD40 repeat                                                 |
| GRMZM2G502940    | 186538248      | 186538450     |                                                             |
| AC215187.3_FG003 | 186593280      | 186593915     |                                                             |
| AC205695.3_FG008 | 186615110      | 186616941     |                                                             |
| GRMZM2G362303    | 186633675      | 186639255     | Protein kinase, catalytic domain                            |
| GRMZM2G308597    | 186640159      | 186640742     | Calcium-binding EF-hand                                     |
| GRMZM2G449226    | 186652945      | 186655618     |                                                             |
| GRMZM2G391281    | 186674312      | 186675233     |                                                             |
| GRMZM2G391288    | 186675613      | 186678029     | S-receptor-like serine/threonine-protein kinase             |
| GRMZM5G811972    | 186678239      | 186678787     |                                                             |
| AC208564.3_FG004 | 186736360      | 186737646     | Transcription factor, K-box                                 |
| GRMZM2G061739    | 186964841      | 186965674     |                                                             |
| AC211887.3_FG001 | 186964865      | 186965437     |                                                             |
| GRMZM5G832154    | 186972934      | 186973635     |                                                             |
| GRMZM5G800323    | 186973040      | 186973858     |                                                             |
| GRMZM2G061791    | 186995763      | 186999056     |                                                             |
| GRMZM2G359559    | 187002125      | 187004115     | Aminotransferase, class V/Cysteine desulfurase              |
| AC211887.3_FG004 | 187003702      | 187004115     | Calcium-binding EF-hand                                     |
| GRMZM2G059012    | 187055101      | 187062082     | Wall-associated receptor kinase galacturonan-binding domain |
| AC211887.3_FG006 | 187063931      | 187064597     |                                                             |

|                  |           |           |                                                                          |
|------------------|-----------|-----------|--------------------------------------------------------------------------|
| GRMZM2G359434    | 187065602 | 187069942 | Pentatricopeptide repeat                                                 |
| AC211887.3_FG007 | 187065698 | 187066120 | Calcium-binding EF-hand                                                  |
| GRMZM2G059129    | 187091607 | 187095345 | Glycerophosphoryl diester phosphodiesterase                              |
| GRMZM2G085210    | 187118709 | 187121135 | Proton-dependent oligopeptide transporter family                         |
| GRMZM2G119381    | 187179081 | 187180794 |                                                                          |
| GRMZM2G419267    | 187190806 | 187194254 | Glycosyltransferase AER61, uncharacterised                               |
| GRMZM2G445684    | 187269130 | 187271929 | Zinc finger, C2H2                                                        |
| GRMZM2G445676    | 187271948 | 187272122 |                                                                          |
| AC213857.4_FG001 | 187338417 | 187341110 |                                                                          |
| GRMZM2G083755    | 187341766 | 187344871 | Frataxin/CyaY                                                            |
| GRMZM2G083803    | 187344872 | 187345544 |                                                                          |
| AC213857.4_FG003 | 187344907 | 187345239 | EF-Hand 1, calcium-binding site                                          |
| GRMZM2G552850    | 187353437 | 187354156 |                                                                          |
| AC212463.3_FG001 | 187368059 | 187379099 |                                                                          |
| GRMZM5G834455    | 187379121 | 187379438 |                                                                          |
| GRMZM2G142507    | 187380518 | 187384704 |                                                                          |
| GRMZM2G441888    | 187383447 | 187384622 | Photosystem II PsbP, oxygen evolving complex                             |
| GRMZM2G142597    | 187387273 | 187397432 | RNA recognition motif domain                                             |
| GRMZM2G441903    | 187398921 | 187400738 | Zinc finger, AN1-type                                                    |
| GRMZM2G142638    | 187403377 | 187407974 | Poly(A) polymerase, central domain                                       |
| AC212463.3_FG009 | 187435427 | 187436221 |                                                                          |
| GRMZM2G020478    | 187441277 | 187443050 | Serine/threonine- / dual specificity protein kinase,<br>catalytic domain |
| GRMZM2G132763    | 187587612 | 187591058 | Leucine-rich repeat                                                      |
| GRMZM2G132748    | 187626539 | 187627195 | NADH:ubiquinone oxidoreductase, ESSS subunit                             |
| GRMZM2G132704    | 187635249 | 187640520 | Dilute                                                                   |
| GRMZM2G132623    | 187641040 | 187642585 | Ribosomal protein L31e                                                   |
| GRMZM2G435224    | 187641060 | 187642612 |                                                                          |
| GRMZM2G132607    | 187643004 | 187646940 | Carbohydrate kinase PfkB                                                 |
| GRMZM2G563405    | 187649672 | 187650116 |                                                                          |
| GRMZM2G141320    | 187667515 | 187670309 | Diacylglycerol glucosyltransferase, N-terminal                           |
| GRMZM2G040129    | 187753619 | 187755711 | DNA-directed DNA polymerase, family B,<br>mitochondria/virus             |
| GRMZM2G580853    | 187842642 | 187843102 |                                                                          |
| GRMZM2G163771    | 187843888 | 187844570 |                                                                          |
| GRMZM2G163783    | 187845063 | 187845576 |                                                                          |
| GRMZM2G121302    | 187877315 | 187877869 | Cyclophilin-like peptidyl-prolyl cis-trans isomerase<br>domain           |
| GRMZM5G873791    | 187877340 | 187877853 |                                                                          |



|                               |           |           |                                                           |
|-------------------------------|-----------|-----------|-----------------------------------------------------------|
| GRMZM2G121312                 | 187883668 | 187885516 | Leucine-rich repeat-containing N-terminal, type 2         |
| GRMZM2G121398                 | 187889142 | 187892150 |                                                           |
| GRMZM5G839014                 | 187975033 | 187977356 | Ovarian tumour, otubain                                   |
| GRMZM5G836190 ( <i>pan1</i> ) | 187978007 | 187980515 | Leucine-rich repeat-containing N-terminal, type 2         |
| GRMZM5G854901                 | 188014689 | 188017810 | tRNA/rRNA methyltransferase, SpoU                         |
| GRMZM5G879527                 | 188031610 | 188034600 | Myc-type, basic helix-loop-helix (bHLH) domain            |
| GRMZM2G703846                 | 188036995 | 188037538 |                                                           |
| GRMZM5G861100                 | 188059257 | 188062957 |                                                           |
| AC234203.1_FG009              | 188060402 | 188062129 | rRNA-processing protein EFG1                              |
| AC234203.1_FG010              | 188063594 | 188066385 |                                                           |
| AC234203.1_FG011              | 188071750 | 188073648 | Ethylene insensitive 3-like protein, DNA-binding domain   |
| AC234203.1_FG004              | 188083185 | 188089513 | ABC transporter, transmembrane domain                     |
| AC234203.1_FG005              | 188092362 | 188092850 |                                                           |
| GRMZM5G822593                 | 188114875 | 188119970 | Lipoxygenase, LH2                                         |
| GRMZM2G161004                 | 188169374 | 188172490 | G-patch domain                                            |
| GRMZM2G160917                 | 188181863 | 188185970 | Transcription factor, SBP-box                             |
| GRMZM2G159263                 | 188256572 | 188256759 |                                                           |
| GRMZM2G413230                 | 188333139 | 188333371 |                                                           |
| GRMZM2G115436                 | 188342737 | 188344114 |                                                           |
| GRMZM2G115442                 | 188344346 | 188355656 | Short-chain dehydrogenase/reductase SDR                   |
| GRMZM2G115462                 | 188386434 | 188386882 | Ribonuclease T2-like                                      |
| GRMZM2G022499                 | 188457694 | 188461344 | SANT/Myb domain                                           |
| GRMZM2G403669                 | 188600179 | 188600736 |                                                           |
| GRMZM2G403667                 | 188601086 | 188602301 |                                                           |
| GRMZM2G403664                 | 188601935 | 188602807 |                                                           |
| GRMZM2G007681                 | 188719663 | 188811722 | RNA polymerase, N-terminal                                |
| GRMZM2G325543                 | 188733228 | 188736419 | Zinc finger, BED-type predicted                           |
| GRMZM2G430455                 | 188855847 | 188859402 | KOW                                                       |
| GRMZM2G130659                 | 188880026 | 188886014 | Nonaspanin (TM9SF)                                        |
| GRMZM2G430522                 | 188906106 | 188908967 | No apical meristem (NAM) protein                          |
| GRMZM2G467263                 | 188927396 | 188928192 |                                                           |
| GRMZM2G168669                 | 188928450 | 188929193 |                                                           |
| GRMZM2G342437                 | 188983389 | 188985663 |                                                           |
| GRMZM2G042622                 | 188986180 | 188988366 | Serine-threonine/tyrosine-protein kinase catalytic domain |
| GRMZM5G847243                 | 189045340 | 189045985 |                                                           |
| GRMZM2G357919                 | 189077793 | 189078897 | Protein kinase, catalytic domain                          |
| GRMZM2G055992                 | 189081768 | 189085843 | Leucine-rich repeat                                       |

|                  |           |           |                                                |
|------------------|-----------|-----------|------------------------------------------------|
| GRMZM2G056056    | 189088108 | 189090646 |                                                |
| GRMZM2G056122    | 189091152 | 189093163 | Pentatricopeptide repeat                       |
| GRMZM2G088627    | 189145769 | 189150346 | Peptidase M20                                  |
| GRMZM2G009009    | 189188469 | 189190473 |                                                |
| GRMZM2G009117    | 189191520 | 189193031 | Heavy metal-associated domain, HMA             |
| AC186691.4_FG009 | 189196177 | 189197677 |                                                |
| GRMZM2G009154    | 189200093 | 189201905 | Glycosyl-phosphatidyl inositol-anchored, plant |
| GRMZM2G308873    | 189200780 | 189201223 |                                                |
| GRMZM2G158182    | 189276877 | 189277368 |                                                |
| GRMZM2G458441    | 189278497 | 189283529 | Peptidase C54                                  |
| AC186691.4_FG003 | 189334539 | 189334808 |                                                |

---
