# Supplementary material
Source: PubMed Central journal article supplement (PMC4174945)
Supplement: e0113890aa43a5ba0bc0c63a50a34b96_genetics.114.167486-2.pdf [file e0113890aa43a5ba0bc0c63a50a34b96_genetics.114.167486-2.pdf]

**Table S2 NLB QTL mapping studies.**

| Reference                       | Parents     | Resistance source                  | Population          | QTL mapping                | Trait                                                                     | Flanking markers             | Lower CI*    | Upper CI*      |
|---------------------------------|-------------|------------------------------------|---------------------|----------------------------|---------------------------------------------------------------------------|------------------------------|--------------|----------------|
|                                 |             |                                    |                     | Composite interval mapping |                                                                           |                              |              |                |
| Balint-Kurti <i>et al.</i> 2010 | B73 x Mo17  | B73                                | RIL                 | mapping                    | AUDPC (AU06WMD)                                                           | bnlg1598 umc1396             | 187.8        | 191.1          |
| Freymark <i>et al.</i> 1993     | B52 x Mo17  | B52                                | F <sub>2:3</sub>    | Interval mapping           | Average Number of lesions/leaf<br>Average percentage leaf tissue diseased | umc157 umc67<br>umc157 umc67 | 12.2<br>12.2 | 175.6<br>175.6 |
| Welz <i>et al.</i> 1999         | D32 x D145  | D32                                | F <sub>3</sub>      | Composite interval mapping | % diseased leaf area                                                      | csu61b dup12 (dupssr12)      | 181.0        | 239.6          |
| Wisser <i>et al.</i> 2008       | -           | -                                  | Recurrent selection | Selection mapping          | -                                                                         | bnlg615                      | 201.0        |                |
| Chung <i>et al.</i> 2010        | B73 x Tx303 | Tx303                              | NILs                | -                          | IP, AUDPC                                                                 | umc1754 umc2234              | 180.0        | 187.4          |
| Chung <i>et al.</i> 2011        | B73 x CML52 | CML52                              | HIFs                | -                          | IP, lesion number, diseased leaf area, AUDPC                              |                              | 182.6        | 189.8          |
|                                 | B73 x CML52 | CML52                              | RIL                 | ICIM                       | 3 diseased leaf area ratings                                              |                              | 200.4        | 205.8          |
| Zwonitzer <i>et al.</i> 2010    |             |                                    |                     | Multiple interval mapping  |                                                                           |                              |              |                |
|                                 | Ki14 x B73  | Ki14 B97                           | RIL                 | mapping                    | sAUDPC                                                                    | PZA01041.2 bnlg1057          | 157.1        | 190.0          |
| Poland <i>et al.</i> 2011       | NAM         | CML103<br>CML247<br>CML52<br>CML69 | NAM                 | Joint linkage mapping      | AUDPC                                                                     | PZA02191.1 PZA00619.3        | 182.5        | 195.6          |

Ki11  
Ki3  
M37W  
Mo17  
Mo18W  
NC358  
Tzi8

---

Previous QTL studies that identified QTL for NLB resistance at maize bin 1.06 are listed. Confidence interval (CI) locations are based on AGP\_V2.
